# Supplementary material
Source: publisher figshare collection journal article supplement (https://karger.figshare.com/articles/dataset/_/5982181)
Supplement: Supplementary file 4 [file 1]

Mascot Score Histogram

Protein score is  $-10 \cdot \log(P)$ , where  $P$  is the probability that the observed match is a random event.  
Protein scores greater than 56 are significant ( $p < 0.05$ ).  
Protein scores are derived from ions scores as a non-probabilistic basis for ranking protein hits.

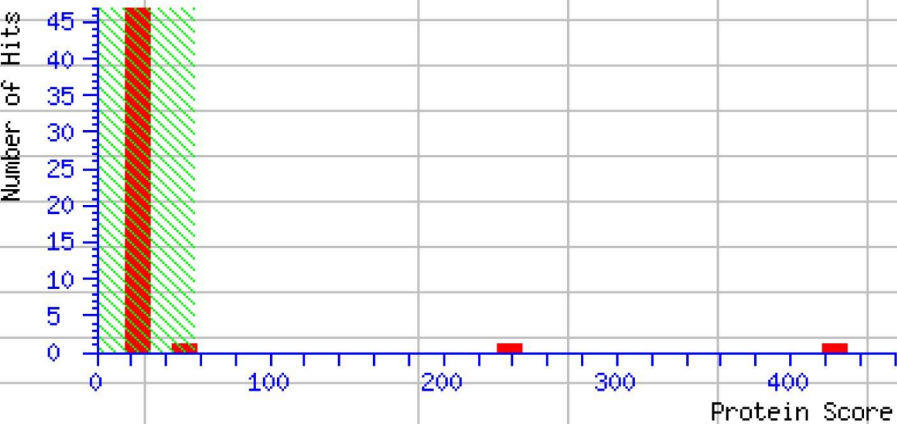

|   |                            |       |     |                                                         |
|---|----------------------------|-------|-----|---------------------------------------------------------|
|   |                            | MW    |     |                                                         |
| 1 | <a href="#">KCRB HUMAN</a> | 42617 | 426 | Creatine kinase B-type OS=Homo sapiens GN=CKB PE=1 SV=1 |
| 2 | <a href="#">KCRM HUMAN</a> | 43074 | 232 | Creatine kinase M-type OS=Homo sapiens GN=CKM PE=1 SV=2 |
