# Supplementary material
Source: publisher figshare collection journal article supplement (https://karger.figshare.com/articles/dataset/_/5982181)

| <u>GGGS Linker Length:</u> | <u>aa</u> | <u>Å</u> |
|----------------------------|-----------|----------|
| GGGS                       | 5         | 9.977    |
| (GGGS)x2                   | 10        | 17.622   |
| (GGGS)x4                   | 20        | 38.653   |
| (GGGS)x5                   | 25        | 47.936   |
| (GGGS)x6                   | 30        | 57.635   |

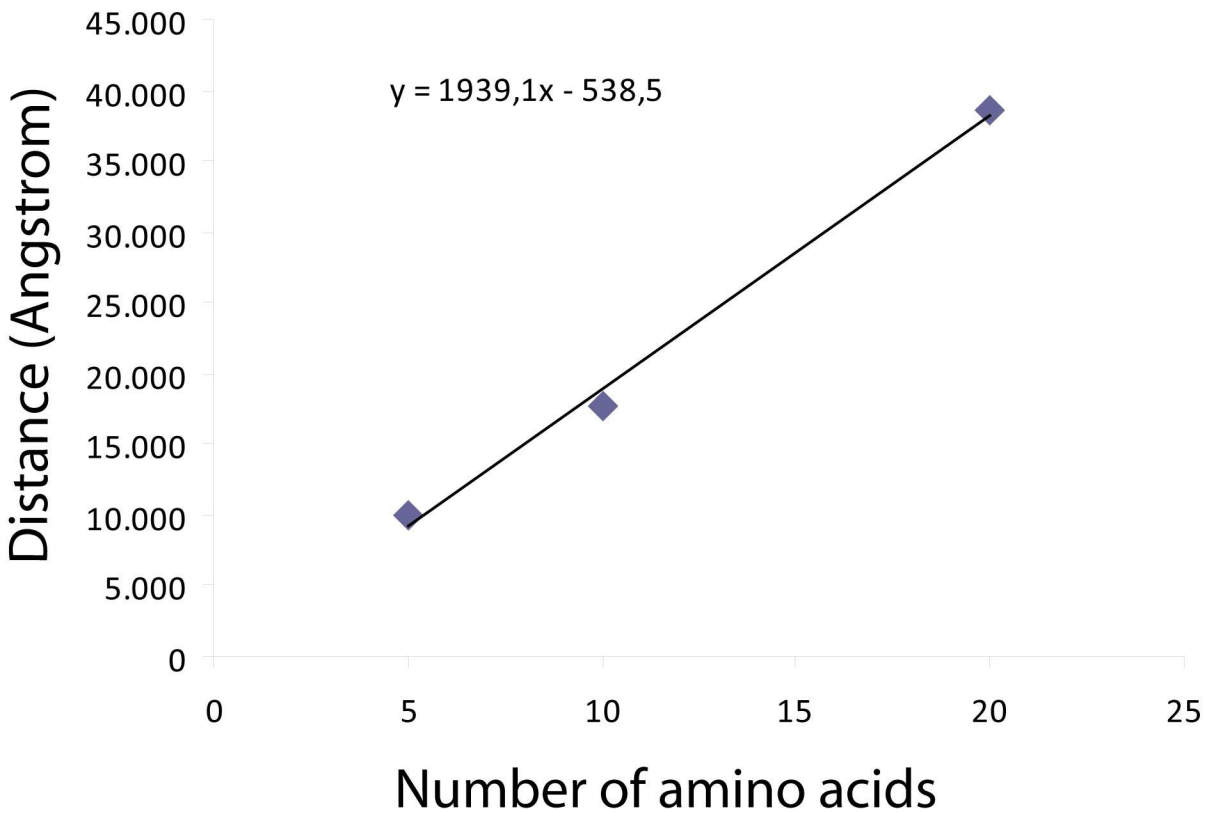

Supplement: Supplementary file 1 [file 1]

hCKMBI

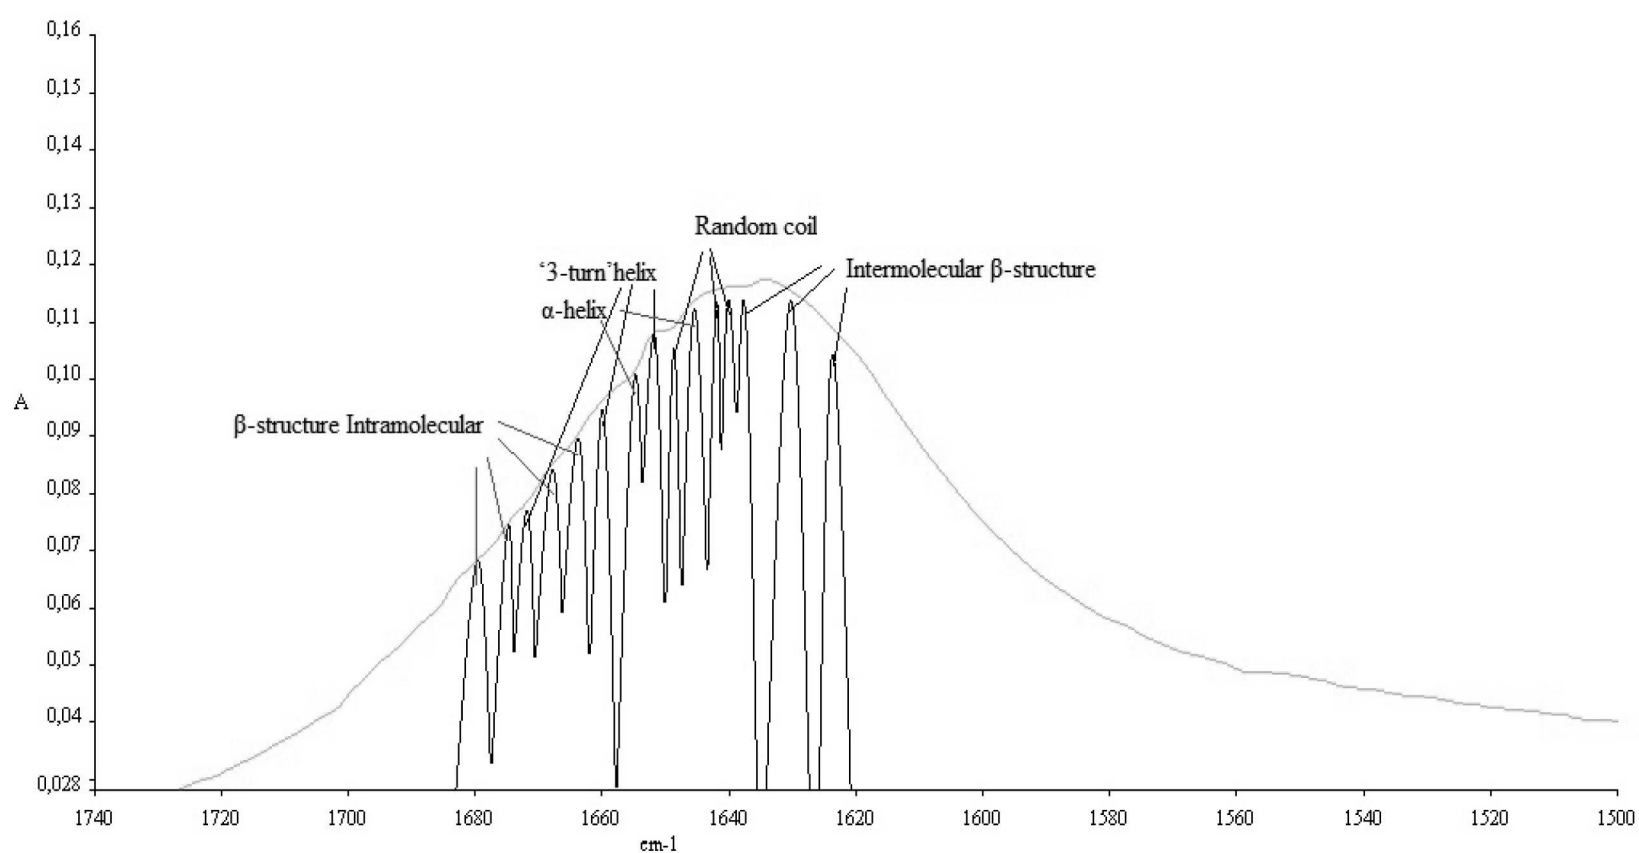

hCKMBc

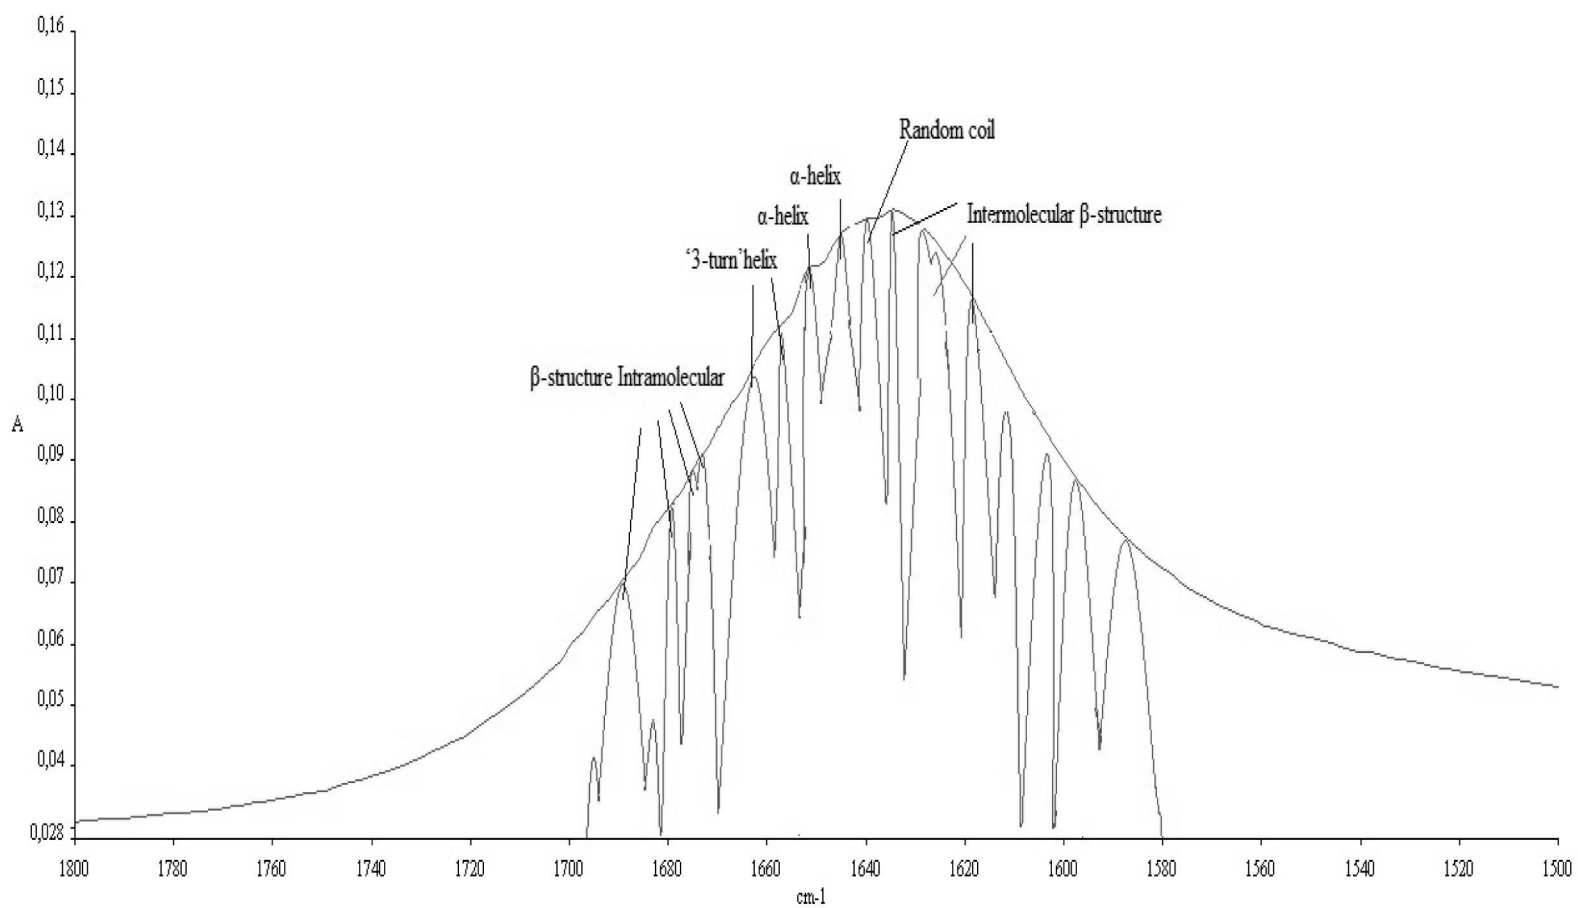

hCKMBs

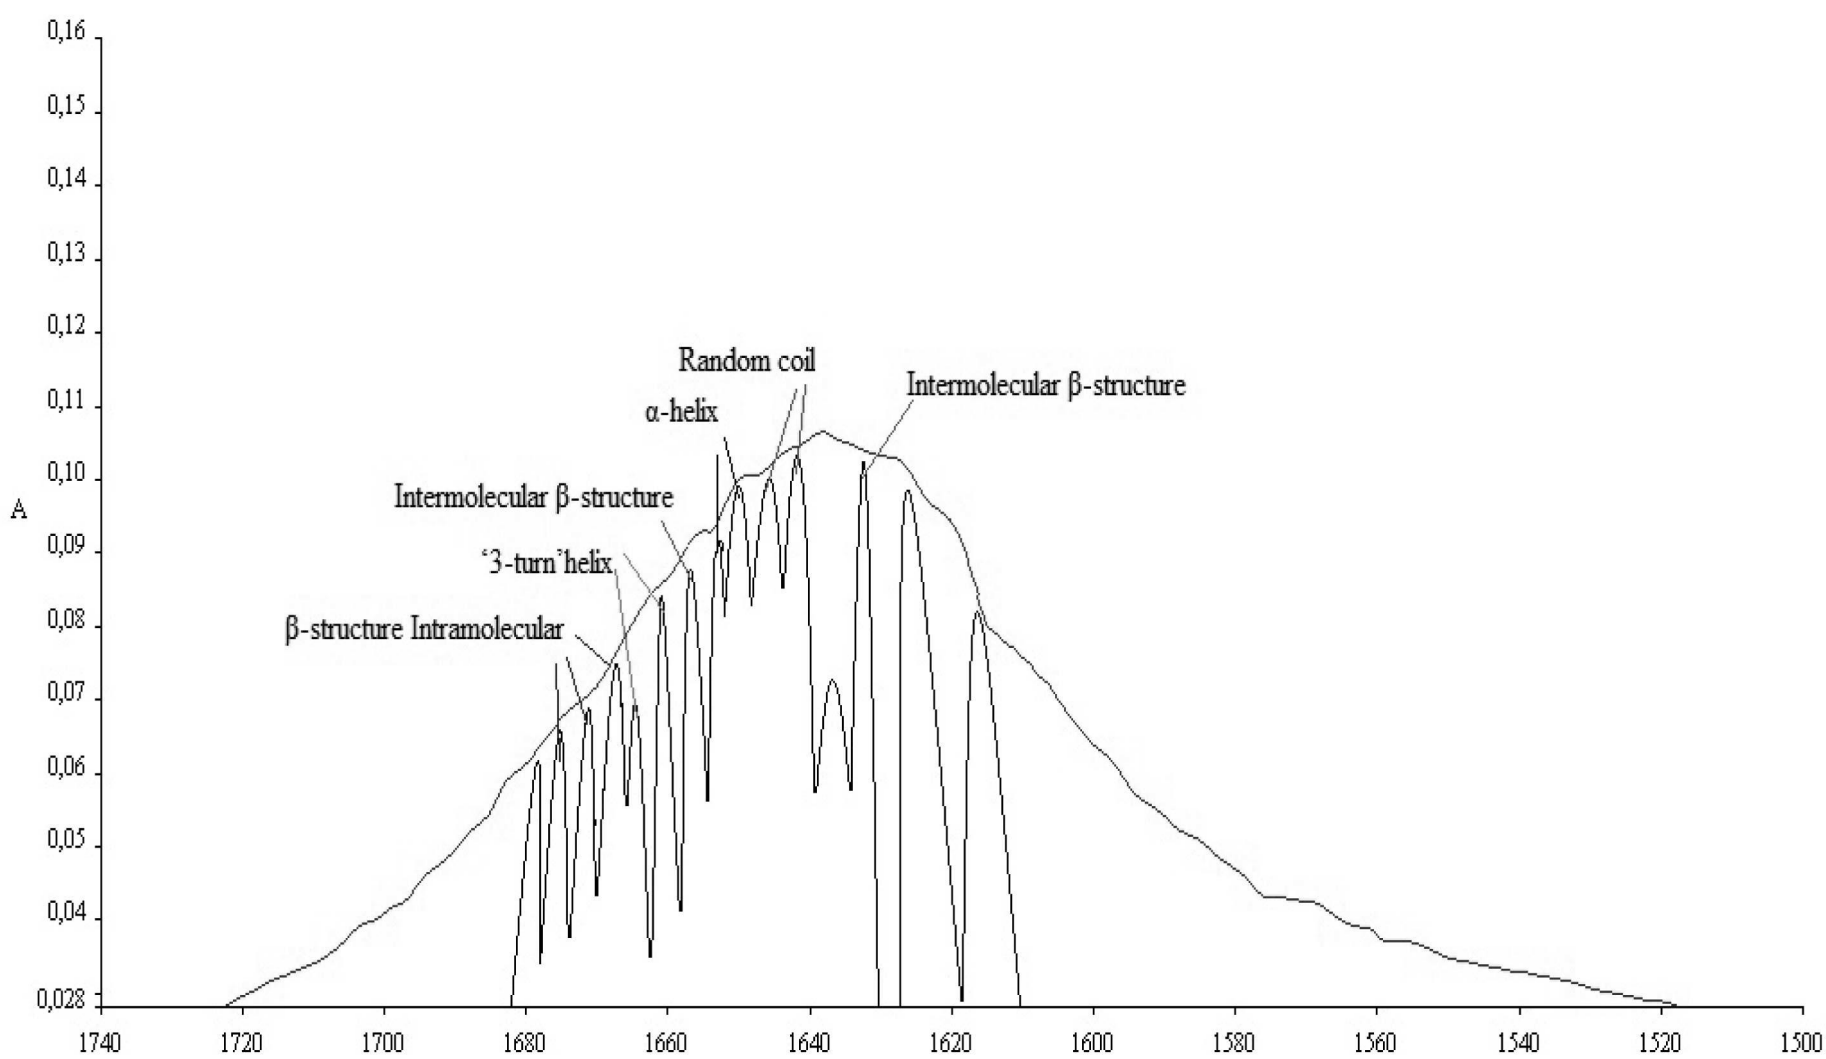

hCKMBt

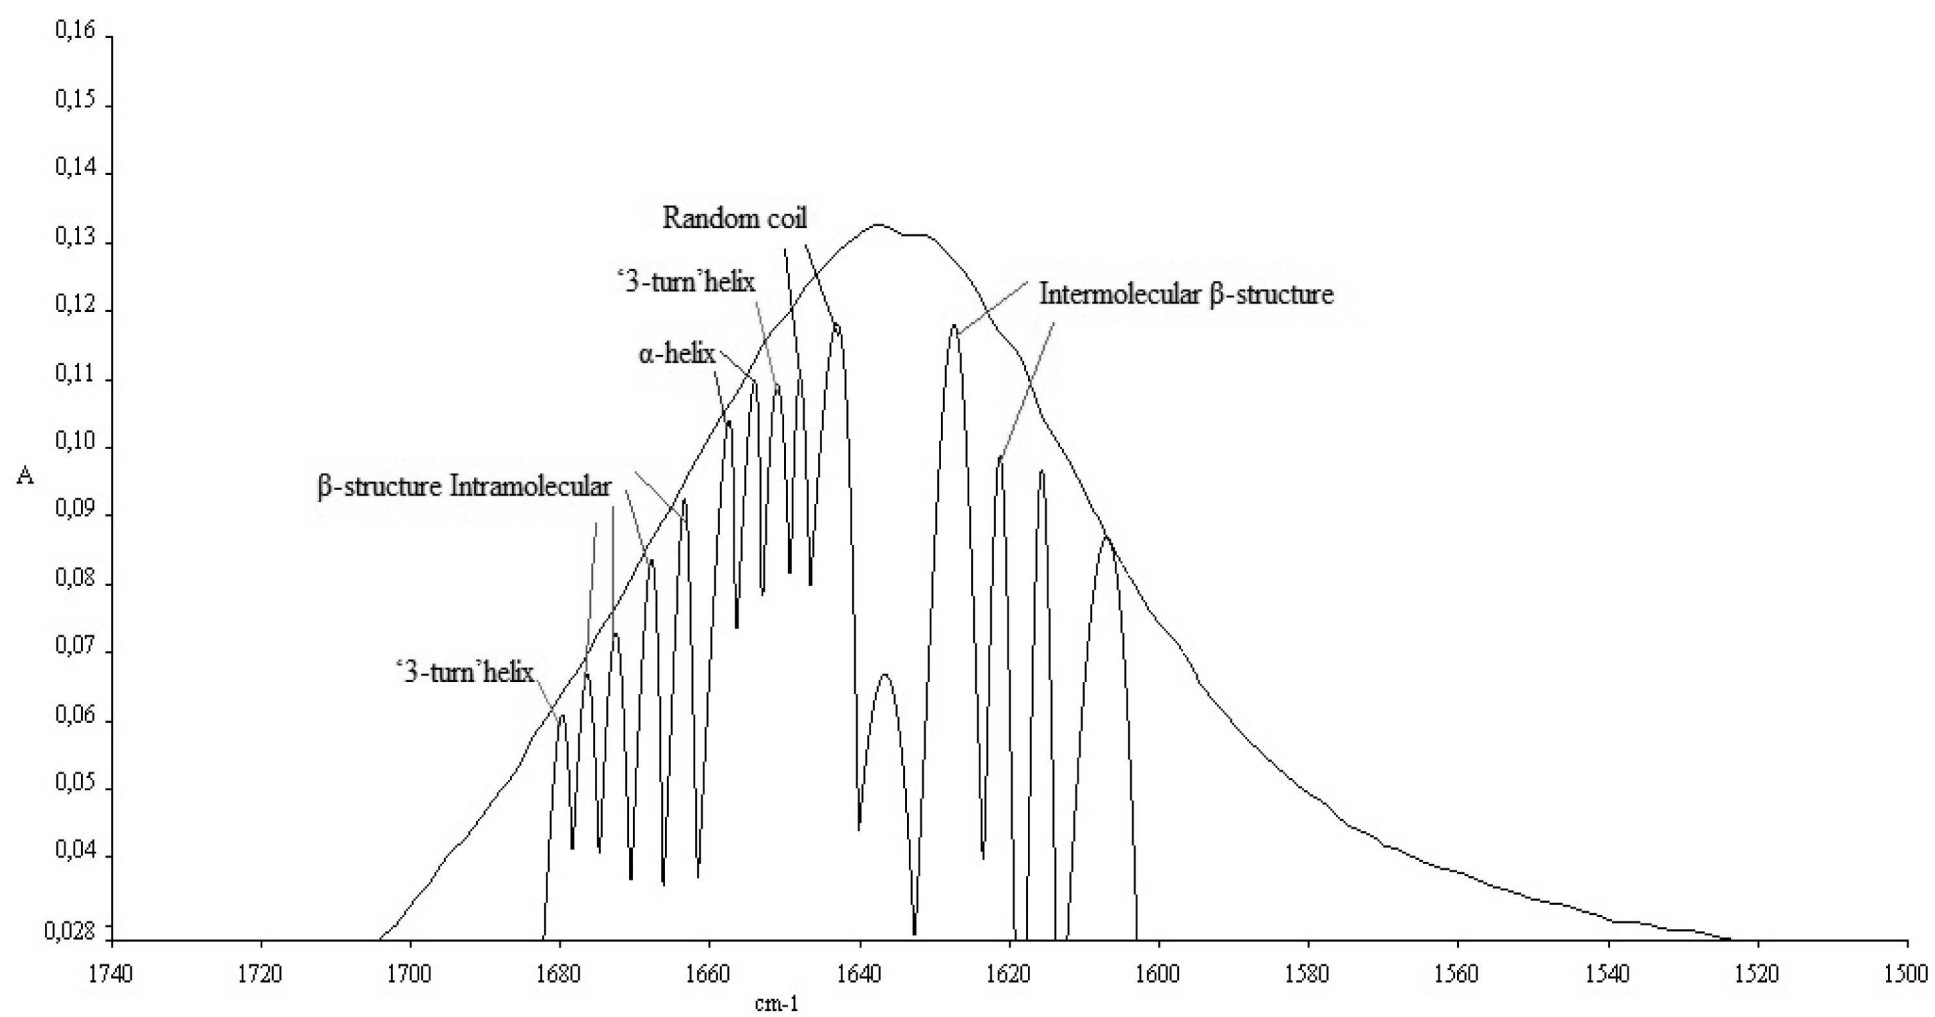

Supplement: Supplementary file 2 [file 1]

hCKM

hCKB

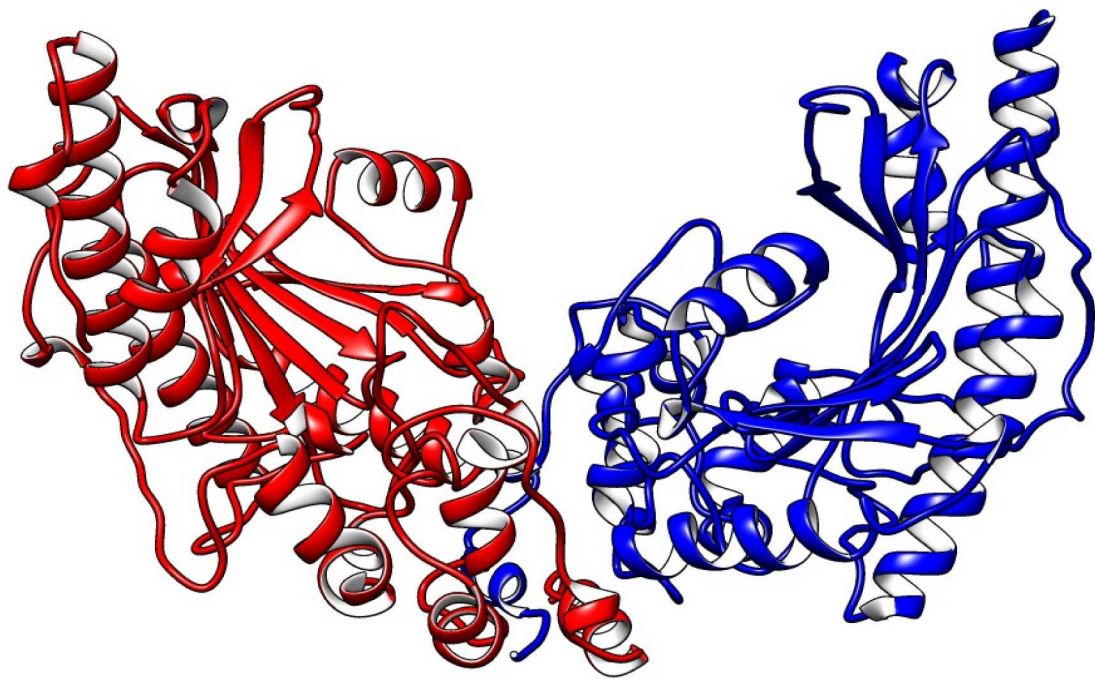

Supplement: Supplementary file 3 [file 1]

(A)

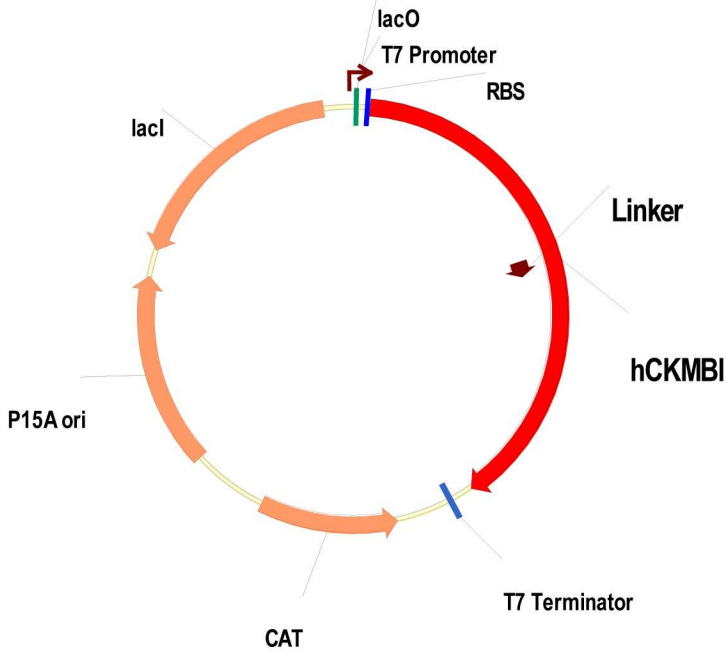

hCKMBI with linker

(B)

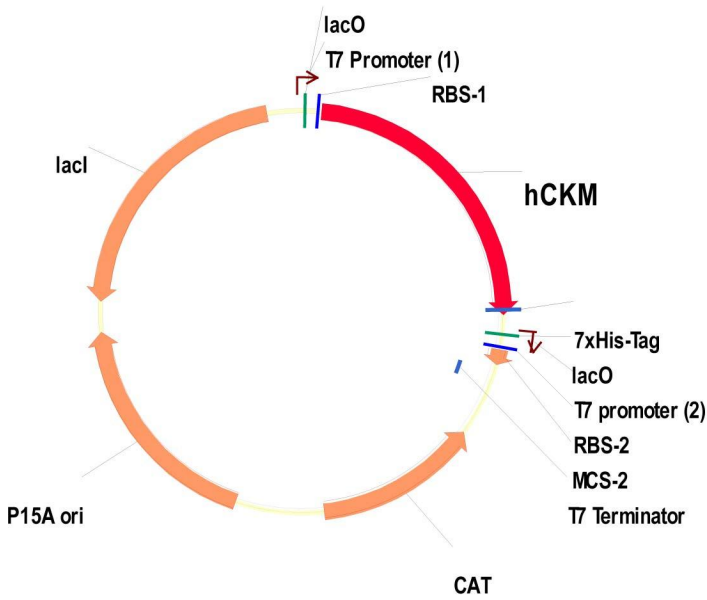

hCKMs with his-tag

(C)

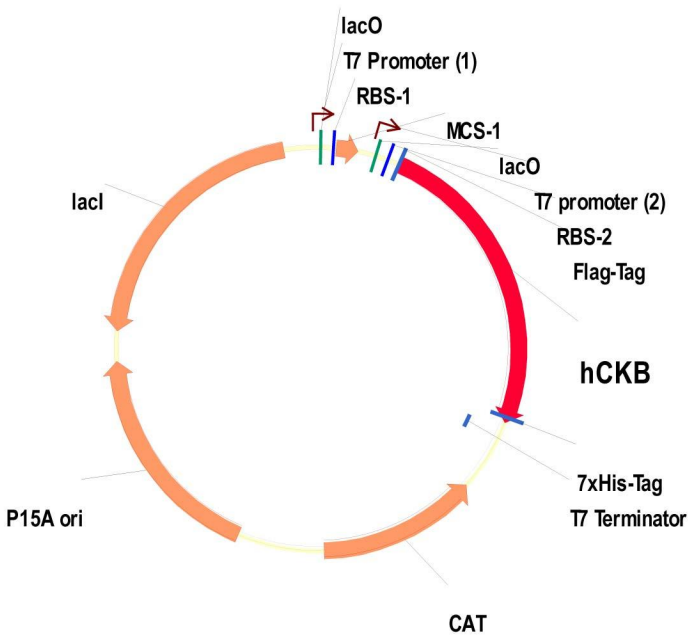

hCKBs with flag-tag

(D)

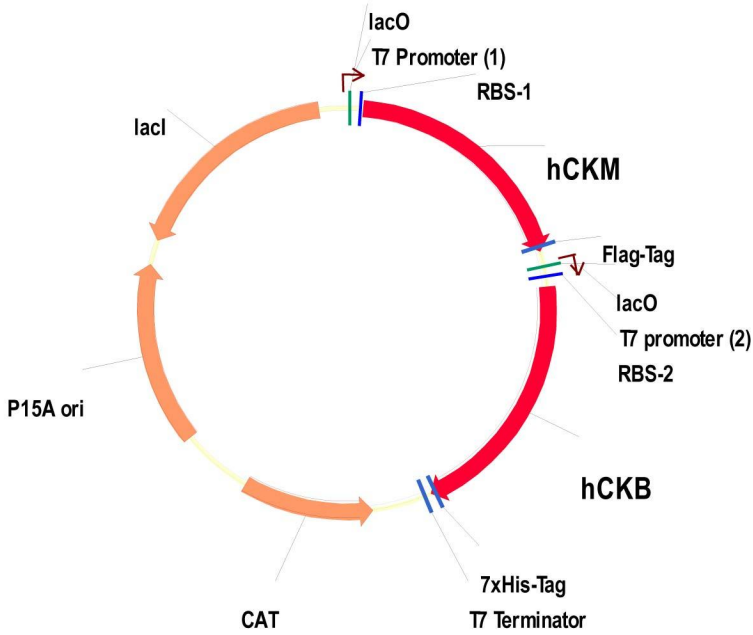

hCKMBt

Supplement: Supplementary file 5 [file 1]

hCKM

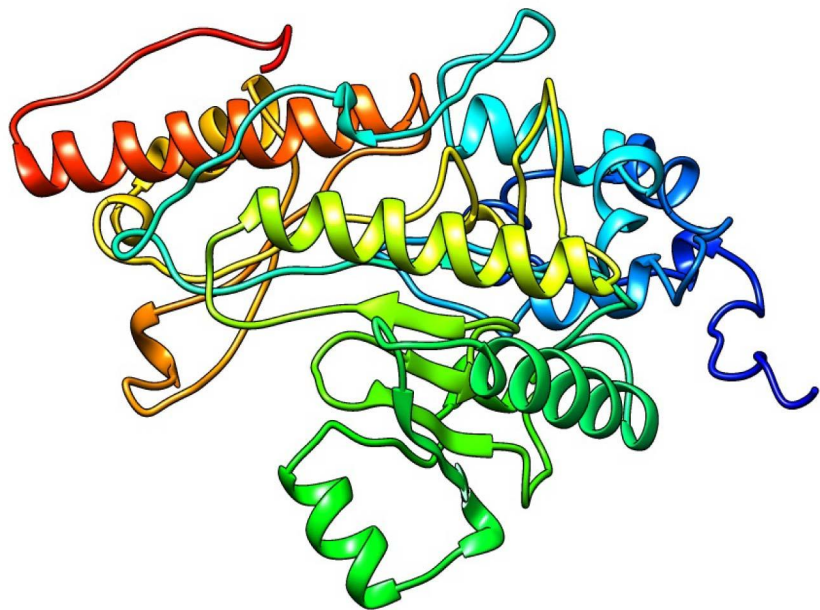

hCKB

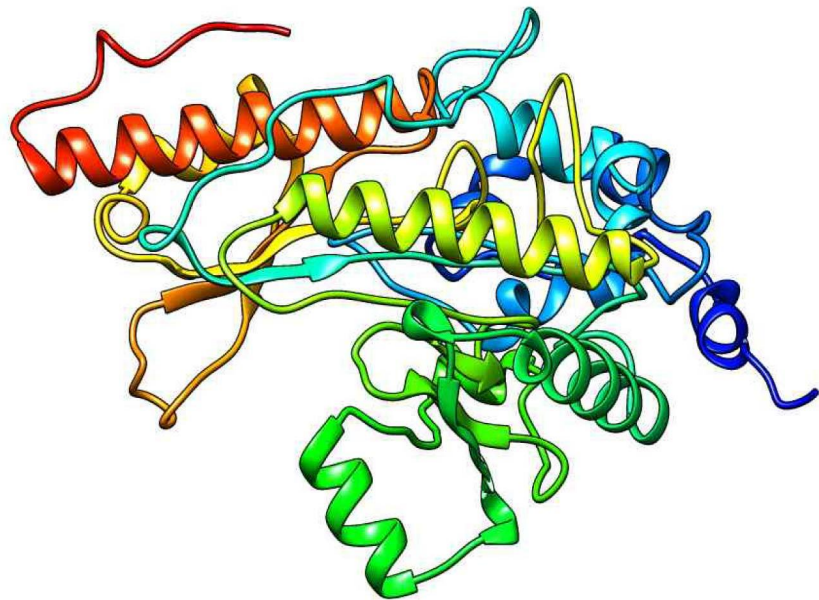

Supplement: Supplementary file 6 [file 1]

CKM

CKB

52.911Å

47.404Å

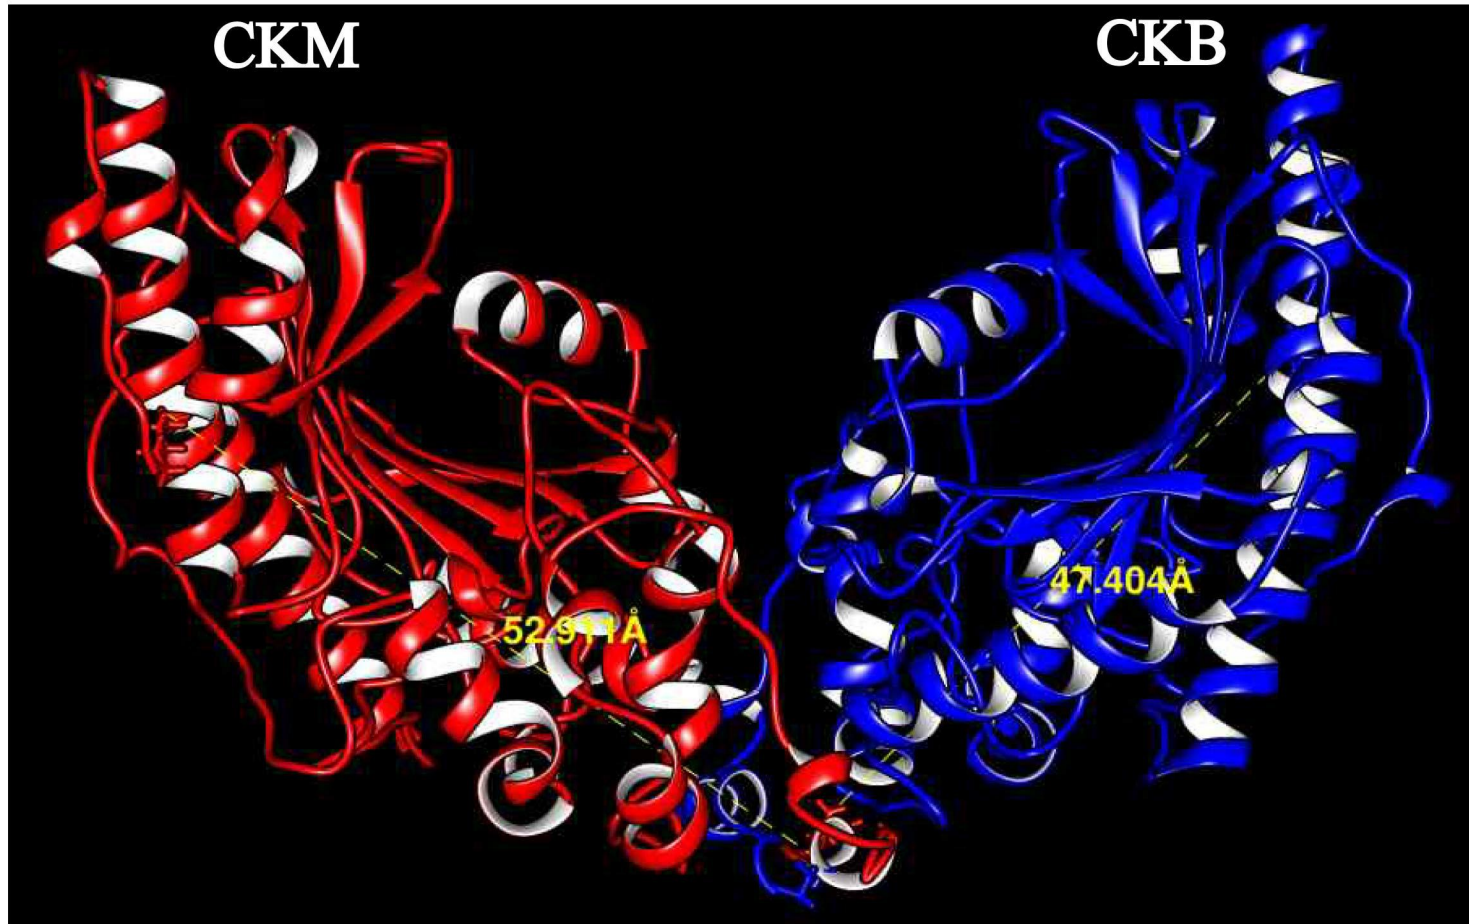

Supplement: Supplementary file 7 [file 1]
